# Supplementary material for: Expanding the Reactive Sulfur Metabolome: Intracellular and Efflux Measurements of Small Oxoacids of Sulfur (SOS) and H2S in Human Primary Vascular Cell Culture
Source: MDPI journal article supplement (doi:10.3390/molecules26237160), 2021-11-26
Supplement: s1 [file s1]

# **Expanding the Reactive Sulfur Metabolome: Intracellular and Efflux Measurements of Small Oxoacids of Sulfur (SOS) and H<sub>2</sub>S in Human Primary Vascular Cell Culture**

Ottis Scrivner<sup>1</sup>, Ahmed Ismaeel<sup>2</sup>, Murugaeson R. Kumar<sup>1</sup>, Kristina Sorokolet<sup>1</sup>, Panagiotis Koutakis<sup>2</sup>,  
Patrick J. Farmer<sup>1\*</sup>

<sup>1</sup> Department of Chemistry and Biochemistry, Baylor University, Waco, TX 76798;  
Patrick\_Farmer@Baylor.edu

<sup>2</sup> Department of Biology, Baylor University, Waco, TX 76798;  
Panagiotis\_Koutakis@baylor.edu

\* Correspondence: Patrick\_Farmer@Baylor.edu

## **Supplemental Data**

**Figure S1. SIC of H<sub>2</sub>S (HPE-S-HPE) in HAOSMC**

**Figure S2. H<sub>2</sub>S calibration curve**

**Figure S3. Dilution factor calculations**

**Figure S4. Peak area to concentration calculation**

**Figure S5. Time dependent efflux of H<sub>2</sub>S, HSOH, and HOSOH in  
human aortic smooth muscle cells and human aortic endothelial cells.**

**Figure S6. Time dependent efflux of H<sub>2</sub>S, HSOH, and HOSOH in human  
coronary smooth muscle cells and human coronary endothelial cells.**

**Figure S7. Time dependent efflux of H<sub>2</sub>S, HSOH, and HOSOH in  
human aortic smooth muscle cells during normoxic and hypoxic growth  
conditions**

---

<sup>1</sup> Current address: Penrose Therapeutics

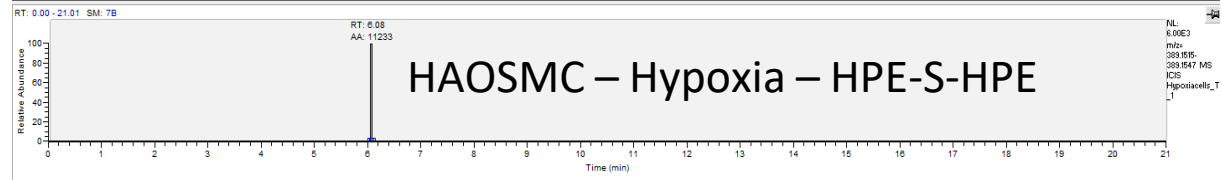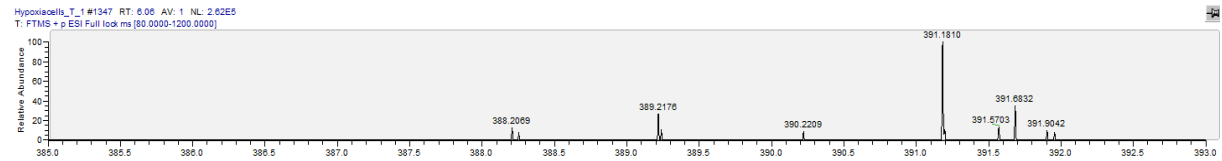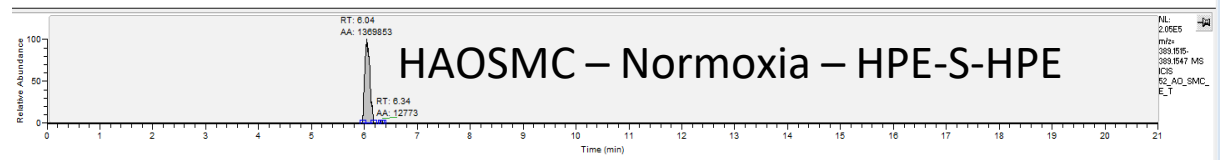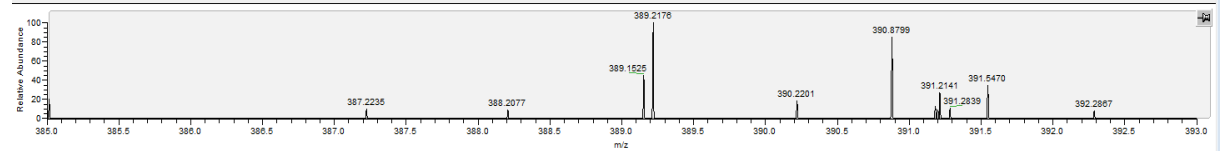

Figure S1. . SIC of H<sub>2</sub>S (HPE-S-HPE) in HAOSMC. Selected ion chromatograms (SICs) showing the peak area of HPE-S-HPE (H<sub>2</sub>S) for human aortic smooth muscle cells (HAOSMC) in both hypoxic and normoxic conditions.

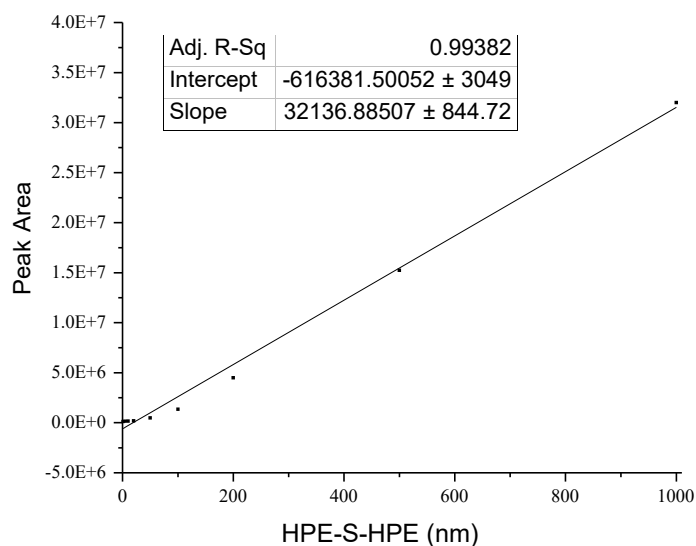

Figure S2. H<sub>2</sub>S Calibration Curve. Calibration curve of H<sub>2</sub>S used to translate H<sub>2</sub>S, HSOH, and HOSOH peaks areas from chromatograms into concentrations. 100  $\mu$ M stock solution of Na<sub>2</sub>S\*9H<sub>2</sub>O solution was prepared in HBSS buffer (pH 7.4) and serially diluted in HBSS buffer (pH 7.4) to generate H<sub>2</sub>S solutions ranging from 1000 nM to 1 nM. Upon dilution, 150 mM stock solutions of HPE-IAM were then diluted 1:100 into each H<sub>2</sub>S solution for a final HPE-IAM concentration of 1.5 mM. These trapped solutions of HPE-S-HPE were used to generate a calibration curve shown in Figure 1. Due to current difficulties in generating HSOH or HOSOH species, this calibration curve was used to calculate HSOH and HOSOH concentrations with the assumption that the ionization efficiencies of HPE-S-D and D-S-D are similar to that of HPE-S-HPE.

Table S3. Dilution Factor Calculations

| Cell Type                    | diameter $\mu\text{m}$ | volume $\mu\text{m}^3$ | mL / cell  | #cells (example) | mL of cells | uL of cells | dilution factor                  |
|------------------------------|------------------------|------------------------|------------|------------------|-------------|-------------|----------------------------------|
|                              |                        |                        |            |                  |             |             | (final volume / volume of cells) |
| Coronary endothelial cells   | 13                     | 1150.35                | 1.15E-09   | 1.83E+05         | 0.00021     | 0.21045     | 9503.444999                      |
| Coronary smooth muscle cells | 7                      | 179.59                 | 1.7959E-10 | 2.10E+05         | 0.00004     | 0.0377139   | 53030.84539                      |
| Aortic endothelial cells     | 13                     | 1150.35                | 1.15E-09   | 127000           | 0.000146    | 0.14605     | 13693.94043                      |
| Aortic smooth muscle cells   | 7                      | 179.59                 | 1.7959E-10 | 242000           | 0.000043    | 0.04346078  | 46018.5022                       |

Table S3 shows the calculations used to determine the dilution factor needed to correct for what is in practice a very small volume of cells generating sulfur species versus the final volume of solution after sample processing is completed. Cell diameters have been determined from those established in the literature as well as contacting the cell vendor for their technical expertise. Those diameters were converted into volume ( $\mu\text{m}^3$ ) followed by a conversion to mL / cell. This volume (mL / cell) is multiplied by a number of cells determined by using a Countess® Automated Cell Counter hemocytometer with trypan blue staining to determine the dilution factor. This dilution factor can then be used to correct for any dilution in concentration (See S4) that occurred during sample processing.



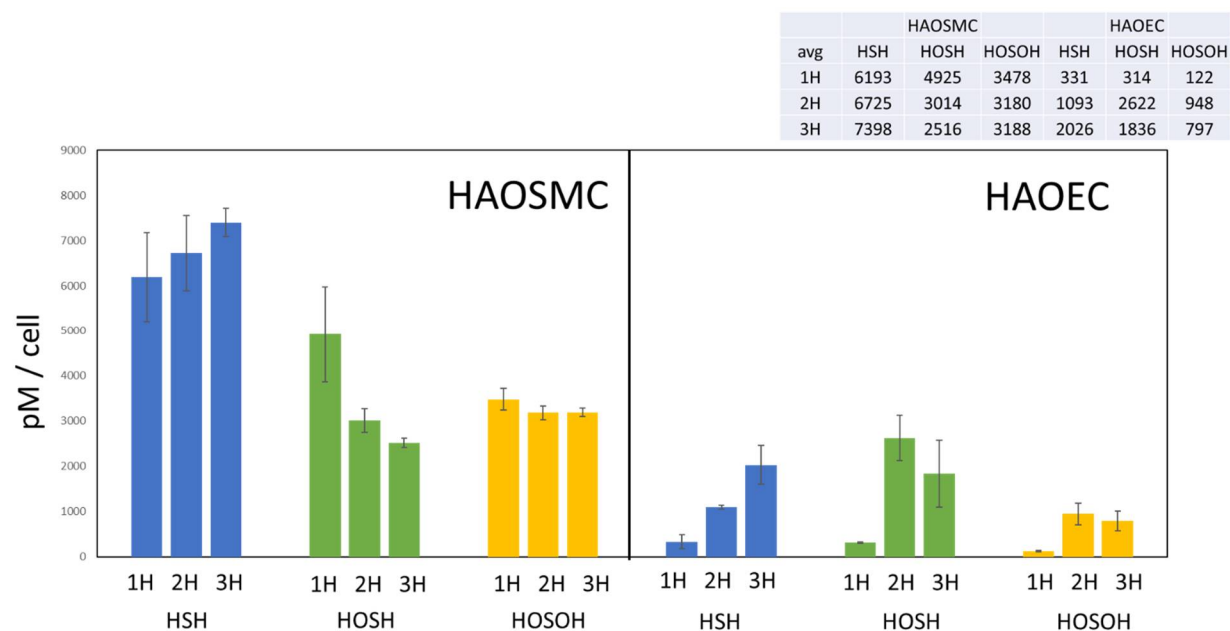

Figure S5. Time dependent efflux of  $\text{H}_2\text{S}$ ,  $\text{HSOH}$ , and  $\text{HOSOH}$  in human aortic smooth muscle cells and human aortic endothelial cells. Individual hour time points of effluxed species for both human aortic smooth muscle cells (HAOSMC) and human aortic endothelial cells (HAOEC). Upon cell confluency, cell media was removed and replaced with HBSS buffer (pH 7.4) for 1, 2, and 3-hour increments. After each hour time point buffer was removed and new buffer was added to cells; the removed buffer fractions were then added to 15-mL centrifuge tubes and either HPE-IAM, HPE-IAM + DMD, or DMD only was to each tube.

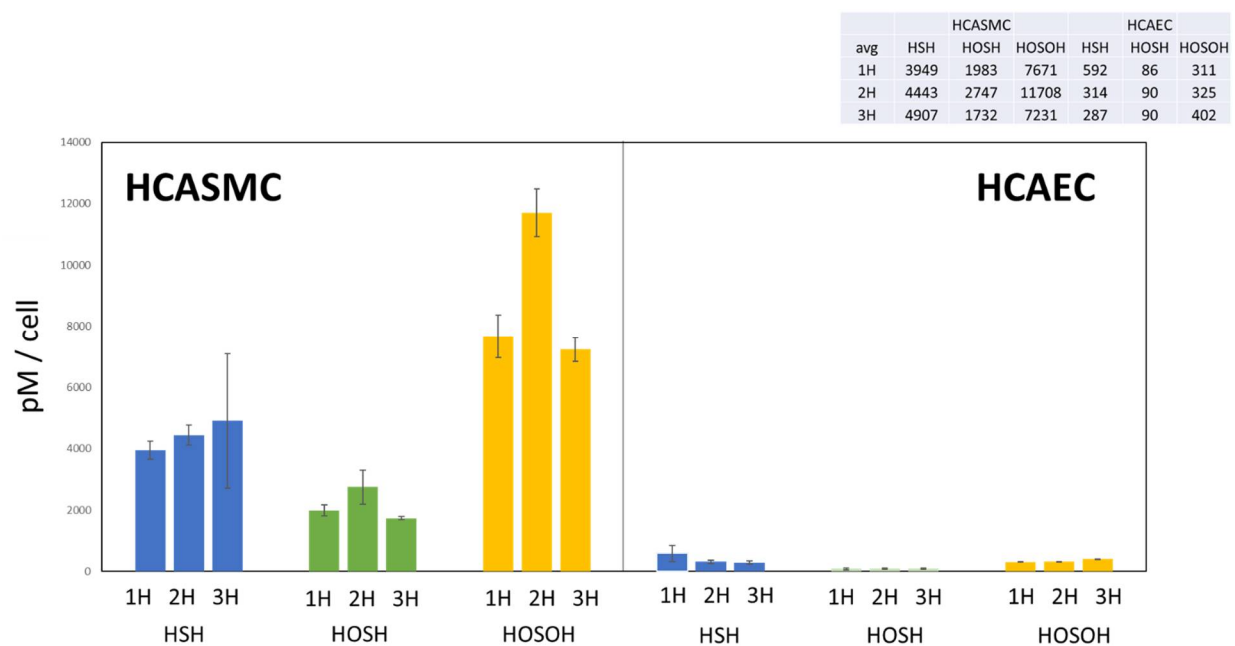

Figure S6. Time dependent efflux of H<sub>2</sub>S, HSOH, and HOSOH in human coronary smooth muscle cells and human coronary endothelial cells. Individual hour time points of effluxed species for both human coronary smooth muscle cells (HCASMC) and human coronary endothelial cells (HCAEC). Upon cell confluency, cell media was removed and replaced with HBSS buffer (pH 7.4) for 1, 2, and 3- hour increments. After each hour time point buffer was removed and new buffer was added to cells; the removed buffer fractions were then added to 15-mL centrifuge tubes and either HPE- IAM, HPE-IAM + DMD, or DMD only was to each tube.

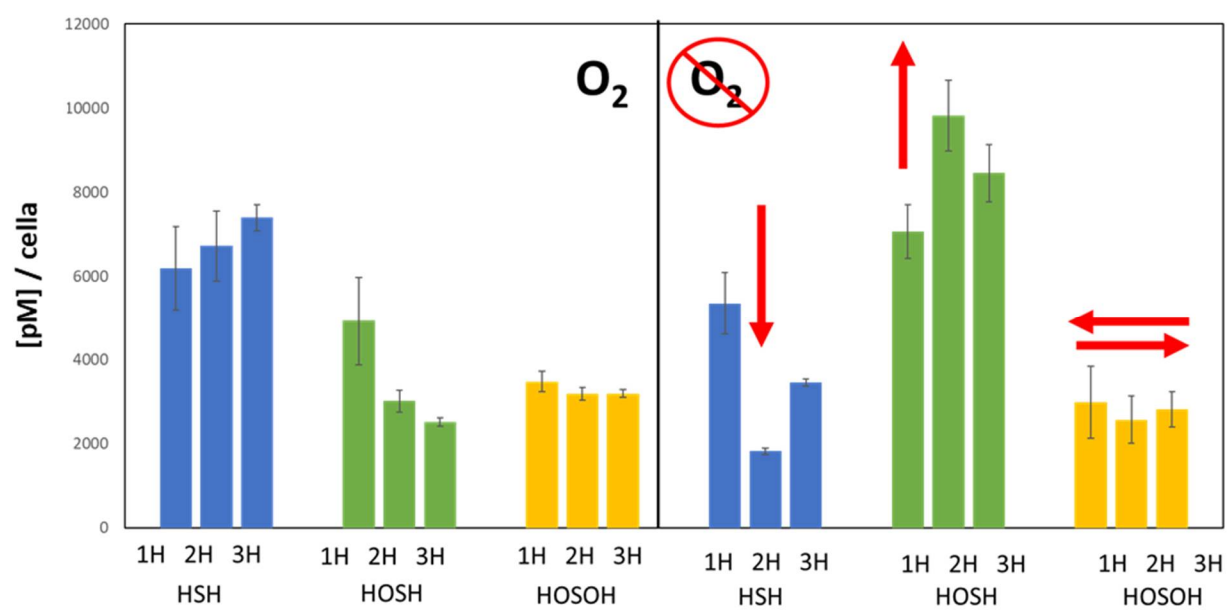

Figure S7. Time dependent efflux of  $H_2S$ ,  $HSOH$ , and  $HOSOH$  in human aortic smooth muscle cells during normoxic and hypoxic growth conditions
